# Supplementary material for: Pharmacokinetic Modeling to Guide Preclinical Development of an Islatravir-Eluting Reservoir-Style Biodegradable Implant for Long-Acting HIV PrEP
Source: MDPI journal article supplement (doi:10.3390/pharmaceutics16020201), 2024-01-30
Supplement: s1 [file s1]

# Pharmaceutics

## Supplementary Material

| No. |                         | Model                          | Param | -2LL | AIC   | BIC   | Diagnostics                                                                          |                                                                                       |                                                                                       |                                                                                       | RSE  |
|-----|-------------------------|--------------------------------|-------|------|-------|-------|--------------------------------------------------------------------------------------|---------------------------------------------------------------------------------------|---------------------------------------------------------------------------------------|---------------------------------------------------------------------------------------|------|
| 1   | Independent Dose Models | 0.1 mg/kg<br>2CMT NPD<br>Multi | 6     | 70.7 | 82.7  | 88.1  | 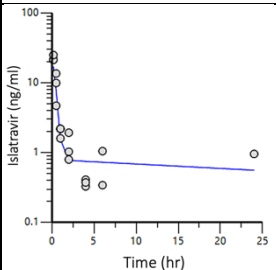   |    |    |    | 0.69 |
| 2   |                         | 0.2 mg/kg<br>2CMT NPD<br>Multi | 6     | 81.1 | 93.8  | 98.8  |   |   |   |   | 0.36 |
| 3   |                         | 1.0 mg/kg<br>2CMT NPD<br>Multi | 6     | 94.1 | 106.1 | 112.4 |  |  |  |  | 0.17 |

| No.                                         |                                     | Model                       | Param                 | -2LL      | AIC    | BIC         | Diagnostics |           |      |            | RSE    |
|---------------------------------------------|-------------------------------------|-----------------------------|-----------------------|-----------|--------|-------------|-------------|-----------|------|------------|--------|
| 4                                           | Simultaneous Dose Model Development | 1CMT NPD Multi              | 4                     | 559.1     | 567.1  | 575.9       |             |           |      |            | 1.14   |
| 5                                           |                                     | 2CMT NPD Multi [Base Model] | 6                     | 414.8     | 426.4  | 438.7       |             |           |      |            | 0.90   |
| 6                                           |                                     | Final Model                 | Base Model no Outlier | 6         | 423.7  | 435.7       | 448.9       |           |      |            |        |
| Base Model vs. Final Model Theta Parameters |                                     |                             |                       |           |        |             |             |           |      |            |        |
|                                             |                                     | Final                       | Base                  | Final     |        | Final       | Base        | Final     |      | Final      | Base   |
|                                             |                                     | Ka (1/h)                    |                       | A (ng/ml) |        | alpha (1/h) |             | B (ng/ml) |      | beta (1/h) |        |
| Estimate                                    |                                     | 12.23                       | 12.79                 | 141.60    | 125.66 | 1.21        | 1.18        | 1.39      | 0.83 | 0.103      | 0.037  |
| Std error                                   |                                     | 2.06                        | 2.12                  | 36.34     | 35.83  | 0.06        | 0.05        | 0.33      | 0.30 | 0.007      | 0.023  |
| CV%                                         |                                     | 16.83                       | 16.59                 | 25.7      | 28.5   | 4.6         | 4.1         | 24.1      | 36.4 | 6.6        | 64.0   |
| 2.5% CI                                     |                                     | 8.11                        | 8.53                  | 68.92     | 53.76  | 1.10        | 1.08        | 0.72      | 0.22 | 0.089      | -0.010 |
| 97.5% CI                                    |                                     | 16.34                       | 17.05                 | 214.28    | 197.57 | 1.32        | 1.28        | 2.06      | 1.43 | 0.117      | 0.083  |

Circles are observed data; blue lines are predicted curves; red lines are distribution of residuals. CMT- compartment; NPD- naïve pooled; RSE- relative standard error; Ka- absorption rate constant; A- 1st CMT macroconstant; B- 2nd CMT macro-constant; alpha/beta- elimination rate constant; CI- confidence interval.

**Table 1: Population pharmacokinetic (PopPK) model development and comparison in Phoenix NLME™.**

The population pharmacokinetic (PopPK) analyses were performed using Phoenix NLME modeling software. The model building process was a stepwise approach: independent modeling of islatravir plasma concentration for the three subcutaneous bolus doses (0.1, 0.3 and 1mg/kg), identification of the most appropriate structural base model followed by developing a simultaneous base model of the collapsed dose range. The base structural model was tested for 1, 2 and 3 compartments, describing first-order absorption and linear elimination. The structural model was developed with a fit-for-purpose approach to deconvolution leveraging macro-parameterization to estimate; first-order absorption rate constant ( $K_a$ ), macro-constants (A and B), elimination rate constants ( $\alpha$  and  $\beta$ ). A 2-compartment structural models provided a better fit for the collapsed simultaneous model of 0.1, 0.3 and 1.0mg/kg dosing levels. Residual diagnostic plots of the 2-comp Final model show some bias in the fit but do not indicate misspecification as with the 1-comp comparator. A 3 Finally, while AIC increases with addition of a second compartment the -2Loglikelihood decreases (-113). Overall, the fits and criteria indicate an improvement with a 2-compartment structure. Final overall model error decreases from 113% to 76% from a 1 to 2-compartment model when no other factors were changed.

|                                                                                                                     |                |
|---------------------------------------------------------------------------------------------------------------------|----------------|
| <pre>proc model data=work.RatKinetic;   by Ind;   parms K0=42576;   Mt= K0*t;   fit Mt;    run;</pre>               | Zero order     |
| <pre>proc model data=work.RatKinetic;   by Ind;   parms Kf=.01;   LnMr=Kf*t;   fit LnMr;   run;</pre>               | First order    |
| <pre>proc model data=work.RatKinetic;   by Ind;   parms Kh=1000;   Mt=Kh*(t**.5);   fit Mt;   run;</pre>            | Higuchi        |
| <pre>proc model data=work.RatKinetic;   by Ind;   parms Krp=0.001 n=0.45;   Ft = Krp*(t**n);   fit Ft;   run;</pre> | Ritgers-Peppas |

Figure 1: Model code for regression analysis of 4 kinetic models of drug distribution in SAS™ 9.4.

Top down shows each model formula and initial estimate used to fit a regression using the ordinary least squared function. Where  $Mt$  is the rate constant of each respective model,  $Ft$  is the ratio of  $Mt/Minf$  (the mass loaded in the implant),  $n$  is the power exponent of release, and
